# Supplementary material for: Microbial Profile and Safety of Chicken Eggs from a Poultry Farm and Small-Scale Vendors in Hawassa, Southern Ethiopia
Source: Hindawi journal article supplement (doi:10.1155/2022/7483253), 2022-05-23
Supplement: f1 [file 7483253.f1.docx]

Supplementary Table 1. Descriptive summary values of the microbial loads of the egg shell rinsate of egg sample collected from different locations in Hawassa, southern Ethiopia

| Microbial load | Sampling location | N | Mean | Std. Deviation | Std. Error | 95% Confidence Interval for Mean | | Minimum | Maximum |
| --- | --- | --- | --- | --- | --- | --- | --- | --- | --- |
| Lower Bound | Upper Bound |
| AMBC | Meneharya | 9 | 9.70 | 0.65 | 0.22 | 9.20 | 10.20 | 8 | 10.1 |
| Wukro | 9 | 9.84 | 0.14 | 0.05 | 9.74 | 9.95 | 9.6 | 10 |
| Atote | 9 | 9.57 | 0.66 | 0.22 | 9.06 | 10.07 | 8.1 | 10.6 |
| Addis ketema | 9 | 9.03 | 0.98 | 0.33 | 8.28 | 9.78 | 7.9 | 10.1 |
| Bahil Adarash | 9 | 9.42 | 0.73 | 0.24 | 8.86 | 9.98 | 7.6 | 10.1 |
| HUPF | 9 | 9.73 | 0.19 | 0.06 | 9.59 | 9.88 | 9.5 | 10.09 |
| Total | 54 | 9.55 | 0.66 | 0.09 | 9.37 | 9.73 | 7.6 | 10.6 |
| EC | Meneharya | 9 | 5.96 | 3.50 | 1.17 | 3.27 | 8.66 | 0 | 9 |
| Wukro | 9 | 6.18 | 3.60 | 1.20 | 3.41 | 8.94 | 0 | 8.9 |
| Atote | 9 | 7.01 | 0.93 | 0.31 | 6.30 | 7.73 | 5 | 8.6 |
| Addis ketema | 9 | 5.87 | 3.56 | 1.19 | 3.13 | 8.61 | 0 | 8.8 |
| BahilAdaras | 9 | 5.53 | 2.56 | 0.85 | 3.57 | 7.50 | 0 | 9.3 |
| HUPF | 9 | 6.23 | 2.49 | 0.83 | 4.32 | 8.14 | 0 | 7.9 |
| Total | 54 | 6.13 | 2.83 | 0.38 | 5.36 | 6.90 | 0 | 9.3 |
| TCC | Meneharya | 9 | 3.57 | 4.27 | 1.42 | 0.29 | 6.85 | 0 | 9.4 |
| Wukro | 9 | 4.60 | 4.41 | 1.47 | 1.21 | 7.99 | 0 | 9.5 |
| Atote | 9 | 0.62 | 1.87 | 0.62 | -0.81 | 2.06 | 0 | 5.6 |
| Addis ketema | 9 | 4.38 | 4.36 | 1.45 | 1.02 | 7.73 | 0 | 9.7 |
| BahilAdaras | 9 | 0.62 | 1.87 | 0.62 | -0.81 | 2.06 | 0 | 5.6 |
| HUPF | 9 | 1.37 | 2.77 | 0.92 | -0.76 | 3.50 | 0 | 7.3 |
| Total | 54 | 2.53 | 3.71 | 0.50 | 1.51 | 3.54 | 0 | 9.7 |
| FCC | Meneharya | 9 | 0.83 | 2.50 | 0.83 | -1.09 | 2.76 | 0 | 7.5 |
| Wukro | 9 | 0.83 | 2.50 | 0.83 | -1.09 | 2.76 | 0 | 7.5 |
| Atote | 9 | 1.06 | 3.17 | 1.06 | -1.38 | 3.49 | 0 | 9.5 |
| Addis ketema | 9 | 1.79 | 3.58 | 1.19 | -0.96 | 4.54 | 0 | 9 |
| BahilAdaras | 9 | 0.83 | 2.50 | 0.83 | -1.09 | 2.76 | 0 | 7.5 |
| HUPF | 9 | 2.03 | 3.09 | 1.03 | -0.34 | 4.41 | 0 | 7.2 |
| Total | 54 | 1.23 | 2.82 | 0.38 | 0.46 | 2.00 | 0 | 9.5 |
| SC | Meneharya | 9 | 7.17 | 2.79 | 0.93 | 5.02 | 9.31 | 0 | 9.9 |
| Wukro | 9 | 7.79 | 3.04 | 1.01 | 5.46 | 10.12 | 0 | 9.7 |
| Atote | 9 | 7.82 | 0.57 | 0.19 | 7.39 | 8.26 | 7.4 | 9.2 |
| Addis ketema | 9 | 6.26 | 3.59 | 1.20 | 3.50 | 9.02 | 0 | 9.2 |
| BahilAdaras | 9 | 8.07 | 3.07 | 1.02 | 5.71 | 10.43 | 0 | 9.6 |
| HUPF | 9 | 8.76 | 0.99 | 0.33 | 8.00 | 9.51 | 7 | 9.8 |
| Total | 54 | 7.64 | 2.60 | 0.35 | 6.93 | 8.35 | 0 | 9.9 |
| YMC | Meneharya | 9 | 8.93 | 0.87 | 0.29 | 8.27 | 9.60 | 7.5 | 9.7 |
| Wukro | 9 | 9.00 | 0.85 | 0.28 | 8.34 | 9.66 | 7.5 | 9.7 |
| Atote | 9 | 4.64 | 3.53 | 1.18 | 1.93 | 7.35 | 0 | 7.5 |
| Addis ketema | 9 | 6.29 | 0.92 | 0.31 | 5.58 | 7.00 | 5.4 | 7.5 |
| BahilAdaras | 9 | 5.99 | 2.40 | 0.80 | 4.15 | 7.83 | 0 | 7.7 |
| HUPF | 9 | 2.73 | 3.31 | 1.10 | 0.19 | 5.28 | 0 | 7.8 |
| Total | 54 | 6.26 | 3.13 | 0.43 | 5.41 | 7.12 | 0 | 9.7 |

Supplementary Table 2. One way ANOV results of the average microbial load of the shell surface rinsates of the egg samples collected from different locations in Hawassa city, southern Ethiopia

|  | | Sum of Squares | df | Mean Square | F | Sig. |
| --- | --- | --- | --- | --- | --- | --- |
| AMBC | Between Groups | 44.03 | 5 | 8.81 | 2.77 | 0.03 |
| Within Groups | 152.68 | 48 | 3.18 |  |  |
| Total | 196.72 | 53 |  |  |  |
| EC | Between Groups | 88.53 | 5 | 17.71 | 1.39 | 0.25 |
| Within Groups | 611.49 | 48 | 12.74 |  |  |
| Total | 700.02 | 53 |  |  |  |
| TCC | Between Groups | 80.01 | 5 | 16.00 | 1.39 | 0.25 |
| Within Groups | 553.62 | 48 | 11.53 |  |  |
| Total | 633.63 | 53 |  |  |  |
| FCC | Between Groups | 133.08 | 5 | 26.62 | 3.65 | 0.01 |
| Within Groups | 350.46 | 48 | 7.30 |  |  |
| Total | 483.54 | 53 |  |  |  |
| SC | Between Groups | 108.86 | 5 | 21.77 | 2.95 | 0.02 |
| Within Groups | 354.17 | 48 | 7.38 |  |  |
| Total | 463.02 | 53 |  |  |  |
| YMC | Between Groups | 635.03 | 5 | 127.01 | 22.22 | 0.00 |
| Within Groups | 274.41 | 48 | 5.72 |  |  |
| Total | 909.45 | 53 |  |  |  |

Supplementary Table 3. Multiple comparison of microbial load of the shell surface rinsates of egg among samples collected from the different locations in Hawassa city, Southern Ethiopia (Tukey’s Post Hoc test, HSD)

| Dependent Variable | (I) Sample location | (J) Sample location | Mean Difference (I-J) | Std. Error | Sig. | 95% Confidence Interval | |
| --- | --- | --- | --- | --- | --- | --- | --- |
| Lower Bound | Upper Bound |
| AMBC | Meneharya | Wukro | -0.14 | 0.30 | 1.00 | -1.03 | 0.74 |
| Atote | 0.13 | 0.30 | 1.00 | -0.75 | 1.02 |
| Addis Ketema | 0.67 | 0.30 | 0.24 | -0.22 | 1.55 |
| Bahil Adarash | 0.28 | 0.30 | 0.94 | -0.61 | 1.16 |
| HUPF | -0.03 | 0.30 | 1.00 | -0.92 | 0.85 |
| Wukro | Meneharya | 0.14 | 0.30 | 1.00 | -0.74 | 1.03 |
| Atote | 0.28 | 0.30 | 0.94 | -0.61 | 1.16 |
| Addis Ketema | 0.81 | 0.30 | 0.09 | -0.07 | 1.70 |
| Bahil Adarash | 0.42 | 0.30 | 0.72 | -0.46 | 1.31 |
| HUPF | 0.11 | 0.30 | 1.00 | -0.77 | 1.00 |
| Atote | Meneharya | -0.13 | 0.30 | 1.00 | -1.02 | 0.75 |
| Wukro | -0.28 | 0.30 | 0.94 | -1.16 | 0.61 |
| Addis Ketema | 0.53 | 0.30 | 0.48 | -0.35 | 1.42 |
| Bahil Adarash | 0.14 | 0.30 | 1.00 | -0.74 | 1.03 |
| HUPF | -0.17 | 0.30 | 0.99 | -1.05 | 0.72 |
| Addis Ketema | Meneharya | -0.67 | 0.30 | 0.24 | -1.55 | 0.22 |
| Wukro | -0.81 | 0.30 | 0.09 | -1.70 | 0.07 |
| Atote | -0.53 | 0.30 | 0.48 | -1.42 | 0.35 |
| Bahil Adarash | -0.39 | 0.30 | 0.78 | -1.27 | 0.50 |
| HUPF | -0.70 | 0.30 | 0.20 | -1.58 | 0.19 |
| Bahil Adarash | Meneharya | -0.28 | 0.30 | 0.94 | -1.16 | 0.61 |
| Wukro | -0.42 | 0.30 | 0.72 | -1.31 | 0.46 |
| Atote | -0.14 | 0.30 | 1.00 | -1.03 | 0.74 |
| Addis Ketema | 0.39 | 0.30 | 0.78 | -0.50 | 1.27 |
| HUPF | -0.31 | 0.30 | 0.90 | -1.20 | 0.58 |
| HUPF | Meneharya | 0.03 | 0.30 | 1.00 | -0.85 | 0.92 |
| Wukro | -0.11 | 0.30 | 1.00 | -1.00 | 0.77 |
| Atote | 0.17 | 0.30 | 0.99 | -0.72 | 1.05 |
| Addis Ketema | 0.70 | 0.30 | 0.20 | -0.19 | 1.58 |
| Bahil Adarash | 0.31 | 0.30 | 0.90 | -0.58 | 1.20 |
| EC | Meneharya | Wukro | -0.22 | 1.38 | 1.00 | -4.31 | 3.88 |
| Atote | -1.05 | 1.38 | 0.97 | -5.15 | 3.05 |
| Addis Ketema | 0.10 | 1.38 | 1.00 | -4.00 | 4.19 |
| Bahil Adarash | 0.43 | 1.38 | 1.00 | -3.67 | 4.53 |
| HUPF | -0.27 | 1.38 | 1.00 | -4.37 | 3.83 |
| Wukro | Meneharya | 0.22 | 1.38 | 1.00 | -3.88 | 4.31 |
| Atote | -0.83 | 1.38 | 0.99 | -4.93 | 3.27 |
| Addis Ketema | 0.31 | 1.38 | 1.00 | -3.79 | 4.41 |
| Bahil Adarash | 0.64 | 1.38 | 1.00 | -3.45 | 4.74 |
| HUPF | -0.06 | 1.38 | 1.00 | -4.15 | 4.04 |
| Atote | Meneharya | 1.05 | 1.38 | 0.97 | -3.05 | 5.15 |
| Wukro | 0.83 | 1.38 | 0.99 | -3.27 | 4.93 |
| Addis Ketema | 1.14 | 1.38 | 0.96 | -2.95 | 5.24 |
| Bahil Adarash | 1.48 | 1.38 | 0.89 | -2.62 | 5.58 |
| HUPF | 0.78 | 1.38 | 0.99 | -3.32 | 4.88 |
| Addis Ketema | Meneharya | -0.10 | 1.38 | 1.00 | -4.19 | 4.00 |
| Wukro | -0.31 | 1.38 | 1.00 | -4.41 | 3.79 |
| Atote | -1.14 | 1.38 | 0.96 | -5.24 | 2.95 |
| Bahil Adarash | 0.33 | 1.38 | 1.00 | -3.77 | 4.43 |
| HUPF | -0.37 | 1.38 | 1.00 | -4.47 | 3.73 |
| Bahil Adarash | Meneharya | -0.43 | 1.38 | 1.00 | -4.53 | 3.67 |
| Wukro | -0.64 | 1.38 | 1.00 | -4.74 | 3.45 |
| Atote | -1.48 | 1.38 | 0.89 | -5.58 | 2.62 |
| Addis Ketema | -0.33 | 1.38 | 1.00 | -4.43 | 3.77 |
| HUPF | -0.70 | 1.38 | 1.00 | -4.80 | 3.40 |
| HUPF | Meneharya | 0.27 | 1.38 | 1.00 | -3.83 | 4.37 |
| Wukro | 0.06 | 1.38 | 1.00 | -4.04 | 4.15 |
| Atote | -0.78 | 1.38 | 0.99 | -4.88 | 3.32 |
| Addis Ketema | 0.37 | 1.38 | 1.00 | -3.73 | 4.47 |
| Bahil Adarash | 0.70 | 1.38 | 1.00 | -3.40 | 4.80 |
| TCC | Meneharya | Wukro | -1.03 | 1.63 | 0.99 | -5.86 | 3.79 |
| Atote | 2.94 | 1.63 | 0.47 | -1.88 | 7.77 |
| Addis Ketema | -0.81 | 1.63 | 1.00 | -5.64 | 4.01 |
| Bahil Adarash | 2.94 | 1.63 | 0.47 | -1.88 | 7.77 |
| HUPF | 2.20 | 1.63 | 0.75 | -2.63 | 7.03 |
| Wukro | Meneharya | 1.03 | 1.63 | 0.99 | -3.79 | 5.86 |
| Atote | 3.98 | 1.63 | 0.16 | -0.85 | 8.80 |
| Addis Ketema | 0.22 | 1.63 | 1.00 | -4.60 | 5.05 |
| Bahil Adarash | 3.98 | 1.63 | 0.16 | -0.85 | 8.80 |
| HUPF | 3.23 | 1.63 | 0.36 | -1.59 | 8.06 |
| Atote | Meneharya | -2.94 | 1.63 | 0.47 | -7.77 | 1.88 |
| Wukro | -3.98 | 1.63 | 0.16 | -8.80 | 0.85 |
| Addis Ketema | -3.76 | 1.63 | 0.21 | -8.58 | 1.07 |
| Bahil Adarash | 0.00 | 1.63 | 1.00 | -4.83 | 4.83 |
| HUPF | -0.74 | 1.63 | 1.00 | -5.57 | 4.08 |
| Addis Ketema | Meneharya | 0.81 | 1.63 | 1.00 | -4.01 | 5.64 |
| Wukro | -0.22 | 1.63 | 1.00 | -5.05 | 4.60 |
| Atote | 3.76 | 1.63 | 0.21 | -1.07 | 8.58 |
| Bahil Adarash | 3.76 | 1.63 | 0.21 | -1.07 | 8.58 |
| HUPF | 3.01 | 1.63 | 0.44 | -1.81 | 7.84 |
| Bahil Adarash | Meneharya | -2.94 | 1.63 | 0.47 | -7.77 | 1.88 |
| Wukro | -3.98 | 1.63 | 0.16 | -8.80 | 0.85 |
| Atote | 0.00 | 1.63 | 1.00 | -4.83 | 4.83 |
| Addis Ketema | -3.76 | 1.63 | 0.21 | -8.58 | 1.07 |
| HUPF | -0.74 | 1.63 | 1.00 | -5.57 | 4.08 |
| HUPF | Meneharya | -2.20 | 1.63 | 0.75 | -7.03 | 2.63 |
| Wukro | -3.23 | 1.63 | 0.36 | -8.06 | 1.59 |
| Atote | 0.74 | 1.63 | 1.00 | -4.08 | 5.57 |
| Addis Ketema | -3.01 | 1.63 | 0.44 | -7.84 | 1.81 |
| Bahil Adarash | 0.74 | 1.63 | 1.00 | -4.08 | 5.57 |
| FCC | Meneharya | Wukro | 0.00 | 1.38 | 1.00 | -4.08 | 4.08 |
| Atote | -0.22 | 1.38 | 1.00 | -4.31 | 3.86 |
| Addis Ketema | -0.96 | 1.38 | 0.98 | -5.04 | 3.13 |
| Bahil Adarash | 0.00 | 1.38 | 1.00 | -4.08 | 4.08 |
| HUPF | -1.20 | 1.38 | 0.95 | -5.28 | 2.88 |
| Wukro | Meneharya | 0.00 | 1.38 | 1.00 | -4.08 | 4.08 |
| Atote | -0.22 | 1.38 | 1.00 | -4.31 | 3.86 |
| Addis Ketema | -0.96 | 1.38 | 0.98 | -5.04 | 3.13 |
| Bahil Adarash | 0.00 | 1.38 | 1.00 | -4.08 | 4.08 |
| HUPF | -1.20 | 1.38 | 0.95 | -5.28 | 2.88 |
| Atote | Meneharya | 0.22 | 1.38 | 1.00 | -3.86 | 4.31 |
| Wukro | 0.22 | 1.38 | 1.00 | -3.86 | 4.31 |
| Addis Ketema | -0.73 | 1.38 | 1.00 | -4.82 | 3.35 |
| Bahil Adarash | 0.22 | 1.38 | 1.00 | -3.86 | 4.31 |
| HUPF | -0.98 | 1.38 | 0.98 | -5.06 | 3.11 |
| Addis Ketema | Meneharya | 0.96 | 1.38 | 0.98 | -3.13 | 5.04 |
| Wukro | 0.96 | 1.38 | 0.98 | -3.13 | 5.04 |
| Atote | 0.73 | 1.38 | 1.00 | -3.35 | 4.82 |
| Bahil Adarash | 0.96 | 1.38 | 0.98 | -3.13 | 5.04 |
| HUPF | -0.24 | 1.38 | 1.00 | -4.33 | 3.84 |
| Bahil Adarash | Meneharya | 0.00 | 1.38 | 1.00 | -4.08 | 4.08 |
| Wukro | 0.00 | 1.38 | 1.00 | -4.08 | 4.08 |
| Atote | -0.22 | 1.38 | 1.00 | -4.31 | 3.86 |
| Addis Ketema | -0.96 | 1.38 | 0.98 | -5.04 | 3.13 |
| HUPF | -1.20 | 1.38 | 0.95 | -5.28 | 2.88 |
| HUPF | Meneharya | 1.20 | 1.38 | 0.95 | -2.88 | 5.28 |
| Wukro | 1.20 | 1.38 | 0.95 | -2.88 | 5.28 |
| Atote | 0.98 | 1.38 | 0.98 | -3.11 | 5.06 |
| Addis Ketema | 0.24 | 1.38 | 1.00 | -3.84 | 4.33 |
| Bahil Adarash | 1.20 | 1.38 | 0.95 | -2.88 | 5.28 |
| SC | Meneharya | Wukro | -0.62 | 1.23 | 1.00 | -4.26 | 3.02 |
| Atote | -0.66 | 1.23 | 0.99 | -4.30 | 2.98 |
| Addis Ketema | 0.91 | 1.23 | 0.98 | -2.73 | 4.55 |
| Bahil Adarash | -0.90 | 1.23 | 0.98 | -4.54 | 2.74 |
| HUPF | -1.59 | 1.23 | 0.79 | -5.23 | 2.05 |
| Wukro | Meneharya | 0.62 | 1.23 | 1.00 | -3.02 | 4.26 |
| Atote | -0.03 | 1.23 | 1.00 | -3.67 | 3.61 |
| Addis Ketema | 1.53 | 1.23 | 0.81 | -2.11 | 5.17 |
| Bahil Adarash | -0.28 | 1.23 | 1.00 | -3.92 | 3.36 |
| HUPF | -0.97 | 1.23 | 0.97 | -4.61 | 2.67 |
| Atote | Meneharya | 0.66 | 1.23 | 0.99 | -2.98 | 4.30 |
| Wukro | 0.03 | 1.23 | 1.00 | -3.61 | 3.67 |
| Addis Ketema | 1.57 | 1.23 | 0.80 | -2.07 | 5.21 |
| Bahil Adarash | -0.24 | 1.23 | 1.00 | -3.88 | 3.40 |
| HUPF | -0.93 | 1.23 | 0.97 | -4.57 | 2.71 |
| Addis Ketema | Meneharya | -0.91 | 1.23 | 0.98 | -4.55 | 2.73 |
| Wukro | -1.53 | 1.23 | 0.81 | -5.17 | 2.11 |
| Atote | -1.57 | 1.23 | 0.80 | -5.21 | 2.07 |
| Bahil Adarash | -1.81 | 1.23 | 0.68 | -5.45 | 1.83 |
| HUPF | -2.50 | 1.23 | 0.34 | -6.14 | 1.14 |
| Bahil Adarash | Meneharya | 0.90 | 1.23 | 0.98 | -2.74 | 4.54 |
| Wukro | 0.28 | 1.23 | 1.00 | -3.36 | 3.92 |
| Atote | 0.24 | 1.23 | 1.00 | -3.40 | 3.88 |
| Addis Ketema | 1.81 | 1.23 | 0.68 | -1.83 | 5.45 |
| HUPF | -0.69 | 1.23 | 0.99 | -4.33 | 2.95 |
| HUPF | Meneharya | 1.59 | 1.23 | 0.79 | -2.05 | 5.23 |
| Wukro | 0.97 | 1.23 | 0.97 | -2.67 | 4.61 |
| Atote | 0.93 | 1.23 | 0.97 | -2.71 | 4.57 |
| Addis Ketema | 2.50 | 1.23 | 0.34 | -1.14 | 6.14 |
| Bahil Adarash | 0.69 | 1.23 | 0.99 | -2.95 | 4.33 |
| YAMC | Meneharya | Wukro | -0.07 | 1.08 | 1.00 | -3.27 | 3.14 |
| Atote | 4.28889* | 1.08 | 0.00 | 1.08 | 7.49 |
| Addis Ketema | 2.64 | 1.08 | 0.16 | -0.56 | 5.85 |
| Bahil Adarash | 2.94 | 1.08 | 0.09 | -0.26 | 6.15 |
| HUPF | 6.20000* | 1.08 | 0.00 | 3.00 | 9.40 |
| Wukro | Meneharya | 0.07 | 1.08 | 1.00 | -3.14 | 3.27 |
| Atote | 4.35556* | 1.08 | 0.00 | 1.15 | 7.56 |
| Addis Ketema | 2.71 | 1.08 | 0.14 | -0.49 | 5.92 |
| Bahil Adarash | 3.01 | 1.08 | 0.08 | -0.19 | 6.22 |
| HUPF | 6.26667* | 1.08 | 0.00 | 3.06 | 9.47 |
| Atote | Meneharya | -4.28889* | 1.08 | 0.00 | -7.49 | -1.08 |
| Wukro | -4.35556* | 1.08 | 0.00 | -7.56 | -1.15 |
| Addis Ketema | -1.64 | 1.08 | 0.65 | -4.85 | 1.56 |
| Bahil Adarash | -1.34 | 1.08 | 0.81 | -4.55 | 1.86 |
| HUPF | 1.91 | 1.08 | 0.49 | -1.29 | 5.12 |
| Addis Ketema | Meneharya | -2.64 | 1.08 | 0.16 | -5.85 | 0.56 |
| Wukro | -2.71 | 1.08 | 0.14 | -5.92 | 0.49 |
| Atote | 1.64 | 1.08 | 0.65 | -1.56 | 4.85 |
| Bahil Adarash | 0.30 | 1.08 | 1.00 | -2.90 | 3.50 |
| HUPF | 3.55556* | 1.08 | 0.02 | 0.35 | 6.76 |
| Bahil Adarash | Meneharya | -2.94 | 1.08 | 0.09 | -6.15 | 0.26 |
| Wukro | -3.01 | 1.08 | 0.08 | -6.22 | 0.19 |
| Atote | 1.34 | 1.08 | 0.81 | -1.86 | 4.55 |
| Addis Ketema | -0.30 | 1.08 | 1.00 | -3.50 | 2.90 |
| HUPF | 3.25556* | 1.08 | 0.05 | 0.05 | 6.46 |
| HUPF | Meneharya | -6.20000* | 1.08 | 0.00 | -9.40 | -3.00 |
| Wukro | -6.26667* | 1.08 | 0.00 | -9.47 | -3.06 |
| Atote | -1.91 | 1.08 | 0.49 | -5.12 | 1.29 |
| Addis Ketema | -3.55556* | 1.08 | 0.02 | -6.76 | -0.35 |
| Bahil Adarash | -3.25556* | 1.08 | 0.05 | -6.46 | -0.05 |

Supplementary Table 4. Descriptive summary values of the microbial loads of the contents of egg sample collected from different sub cities in Hawassa, southern Ethiopia

| Microbial load | sampling locations | N | Mean | Standard. Deviation | Standard Error | 95% Confidence Interval for Mean | | Minimum | Maximum |
| --- | --- | --- | --- | --- | --- | --- | --- | --- | --- |
| Lower Bound | Upper Bound |
| AMBC | Meneharya | 9 | 9.93 | 0.56 | 0.19 | 9.50 | 10.36 | 8.6 | 10.4 |
| Wukro | 9 | 9.79 | 0.72 | 0.24 | 9.24 | 10.34 | 8 | 10.4 |
| Atote | 9 | 9.51 | 0.31 | 0.10 | 9.27 | 9.75 | 8.8 | 9.8 |
| Addis Ketema | 9 | 7.31 | 4.19 | 1.40 | 4.09 | 10.53 | 0 | 10 |
| Bahil Adarash | 9 | 9.59 | 0.52 | 0.17 | 9.19 | 9.99 | 8.3 | 10 |
| HUPF | 9 | 9.71 | 0.60 | 0.20 | 9.25 | 10.17 | 8.3 | 10.3 |
| Total | 54 | 9.31 | 1.93 | 0.26 | 8.78 | 9.83 | 0 | 10.4 |
| EC | Meneharya | 9 | 4.58 | 4.40 | 1.47 | 1.20 | 7.96 | 0 | 9 |
| Wukro | 9 | 3.73 | 4.47 | 1.49 | 0.30 | 7.17 | 0 | 9.3 |
| Atote | 9 | 4.64 | 3.03 | 1.01 | 2.31 | 6.97 | 0 | 8.9 |
| Addis Ketema | 9 | 6.40 | 3.74 | 1.25 | 3.53 | 9.27 | 0 | 9.1 |
| Bahil Adarash | 9 | 5.43 | 2.43 | 0.81 | 3.56 | 7.30 | 0 | 8.6 |
| HUPF | 9 | 2.32 | 2.83 | 0.94 | 0.15 | 4.50 | 0 | 6.6 |
| Total | 54 | 4.52 | 3.63 | 0.49 | 3.53 | 5.51 | 0 | 9.3 |
| TCC | Meneharya | 9 | 1.11 | 3.33 | 1.11 | -1.45 | 3.67 | 0 | 9.99 |
| Wukro | 9 | 2.67 | 4.12 | 1.37 | -0.50 | 5.84 | 0 | 9.95 |
| Atote | 9 | 2.35 | 3.74 | 1.25 | -0.53 | 5.22 | 0 | 9.94 |
| Addis Ketema | 9 | 3.76 | 4.59 | 1.53 | 0.23 | 7.29 | 0 | 9.6 |
| Bahil Adarash | 9 | 0.00 | 0.00 | 0.00 | 0.00 | 0.00 | 0 | 0 |
| HUPF | 9 | 1.24 | 2.46 | 0.82 | -0.65 | 3.13 | 0 | 5.6 |
| Total | 54 | 1.85 | 3.46 | 0.47 | 0.91 | 2.80 | 0 | 9.99 |
| FCC | Meneharya | 9 | 0.00 | 0.00 | 0.00 | 0.00 | 0.00 | 0 | 0 |
| Wukro | 9 | 0.00 | 0.00 | 0.00 | 0.00 | 0.00 | 0 | 0 |
| Atote | 9 | 1.26 | 2.49 | 0.83 | -0.66 | 3.17 | 0 | 5.8 |
| Addis Ketema | 9 | 2.78 | 4.33 | 1.44 | -0.55 | 6.11 | 0 | 9.8 |
| Bahil Adarash | 9 | 4.43 | 3.58 | 1.19 | 1.68 | 7.19 | 0 | 9.6 |
| HUPF | 9 | 1.23 | 2.45 | 0.82 | -0.65 | 3.11 | 0 | 5.6 |
| Total | 54 | 1.62 | 3.02 | 0.41 | 0.79 | 2.44 | 0 | 9.8 |
| SC | Meneharya | 9 | 8.54 | 1.06 | 0.35 | 7.73 | 9.36 | 7.5 | 9.9 |
| Wukro | 9 | 7.44 | 2.93 | 0.98 | 5.19 | 9.70 | 0 | 9.7 |
| Atote | 9 | 7.82 | 0.57 | 0.19 | 7.39 | 8.26 | 7.4 | 9.2 |
| Addis Ketema | 9 | 7.72 | 3.07 | 1.02 | 5.36 | 10.09 | 0 | 10.4 |
| Bahil Adarash | 9 | 7.88 | 3.01 | 1.00 | 5.56 | 10.19 | 0 | 9.5 |
| HUPF | 9 | 4.18 | 3.96 | 1.32 | 1.13 | 7.22 | 0 | 7.6 |
| Total | 54 | 7.26 | 2.96 | 0.40 | 6.46 | 8.07 | 0 | 10.4 |
| YAMC | Meneharya | 9 | 9.34 | 0.67 | 0.22 | 8.83 | 9.86 | 7.7 | 9.9 |
| Wukro | 9 | 9.10 | 0.96 | 0.32 | 8.36 | 9.84 | 7.1 | 9.7 |
| Atote | 9 | 2.90 | 4.37 | 1.46 | -0.46 | 6.26 | 0 | 9.2 |
| Addis Ketema | 9 | 7.48 | 1.68 | 0.56 | 6.19 | 8.77 | 5.5 | 9.5 |
| Bahil Adarash | 9 | 4.12 | 3.32 | 1.11 | 1.57 | 6.67 | 0 | 9.3 |
| HUPF | 9 | 0.00 | 0.00 | 0.00 | 0.00 | 0.00 | 0 | 0 |
| Total | 54 | 5.49 | 4.14 | 0.56 | 4.36 | 6.62 | 0 | 9.9 |

Supplementary Table 5. One way ANOV results of the microbial load of the contents of the egg samples collected from different locations in Hawassa city, southern Ethiopia

|  | | Sum of Squares | df | Mean Square | F | Sig. |
| --- | --- | --- | --- | --- | --- | --- |
| AMBC | Between Groups | 44.033 | 5 | 8.81 | 2.77 | 0.03 |
| Within Groups | 152.684 | 48 | 3.18 |  |  |
| Total | 196.717 | 53 |  |  |  |
| EC | Between Groups | 88.528 | 5 | 17.71 | 1.39 | 0.25 |
| Within Groups | 611.493 | 48 | 12.74 |  |  |
| Total | 700.021 | 53 |  |  |  |
| TCC | Between Groups | 80.009 | 5 | 16.00 | 1.39 | 0.25 |
| Within Groups | 553.624 | 48 | 11.53 |  |  |
| Total | 633.632 | 53 |  |  |  |
| FCC | Between Groups | 133.077 | 5 | 26.62 | 3.65 | 0.01 |
| Within Groups | 350.458 | 48 | 7.30 |  |  |
| Total | 483.535 | 53 |  |  |  |
| SC | Between Groups | 108.856 | 5 | 21.77 | 2.95 | 0.02 |
| Within Groups | 354.167 | 48 | 7.38 |  |  |
| Total | 463.023 | 53 |  |  |  |
| YAMC | Between Groups | 635.032 | 5 | 127.01 | 22.22 | 0 |
| Within Groups | 274.413 | 48 | 5.72 |  |  |
| Total | 909.445 | 53 |  |  |  |

Supplementary Table 6. Multiple comparison of microbial load of the contents of egg sample among samples from the different locations in Hawassa city, Southern Ethiopia (Tukey’s Post Hoc test, HSD).

| Dependent Variable | (I) Sample location | (J) Sample location | Mean Difference (I-J) | Std. Error | Sig. | 95% Confidence Interval | |
| --- | --- | --- | --- | --- | --- | --- | --- |
| Lower Bound | Upper Bound |
| AMBC | Meneharya | Wukro | 0.14 | 0.84 | 1 | -2.35 | 2.64 |
|  |  | Atote | 0.42 | 0.84 | 1.00 | -2.07 | 2.92 |
|  |  | Addis ketema | 2.62* | 0.84 | 0.03 | 0.13 | 5.12 |
|  |  | Bahil Adarash | 0.34 | 0.84 | 1.00 | -2.15 | 2.84 |
|  |  | HUPF | 0.22 | 0.84 | 1 | -2.27 | 2.72 |
|  | Wukro | Meneharya | -0.14 | 0.84 | 1 | -2.64 | 2.35 |
|  |  | Atote | 0.28 | 0.84 | 1.00 | -2.22 | 2.77 |
|  |  | Addis ketema | 2.48 | 0.84 | 0.05 | -0.02 | 4.97 |
|  |  | Bahil Adarash | 0.20 | 0.84 | 1 | -2.30 | 2.70 |
|  |  | HUPF | 0.08 | 0.84 | 1 | -2.42 | 2.57 |
|  | Atote y | Meneharya | -0.42 | 0.84 | 1.00 | -2.92 | 2.07 |
|  | Wukro | -0.28 | 0.84 | 1.00 | -2.77 | 2.22 |
|  | Addis ketema | 2.20 | 0.84 | 0.11 | -0.30 | 4.70 |
|  | Bahil Adarash | -0.08 | 0.84 | 1 | -2.57 | 2.42 |
|  | HUPF | -0.20 | 0.84 | 1 | -2.70 | 2.30 |
|  | Addis ketema | Meneharya | -2.62* | 0.84 | 0.03 | -5.12 | -0.13 |
|  | Wukro | -2.48 | 0.84 | 0.05 | -4.97 | 0.02 |
|  | Atote | -2.20 | 0.84 | 0.11 | -4.70 | 0.30 |
|  | Bahil Adarash | -2.28 | 0.84 | 0.09 | -4.77 | 0.22 |
|  | HUPF | -2.40 | 0.84 | 0.07 | -4.90 | 0.10 |
|  | Bahil Adarash | Meneharya | -0.34 | 0.84 | 1.00 | -2.84 | 2.15 |
|  | Wukro | -0.20 | 0.84 | 1 | -2.70 | 2.30 |
|  | Atote | 0.08 | 0.84 | 1 | -2.42 | 2.57 |
|  | Addis ketema | 2.28 | 0.84 | 0.09 | -0.22 | 4.77 |
|  | HUPF | -0.12 | 0.84 | 1 | -2.62 | 2.37 |
|  | HUPF | Meneharya | -0.22 | 0.84 | 1 | -2.72 | 2.27 |
|  | Wukro | -0.08 | 0.84 | 1 | -2.57 | 2.42 |
|  | Atote | 0.20 | 0.84 | 1 | -2.30 | 2.70 |
|  | Addis ketema | 2.40 | 0.84 | 0.07 | -0.10 | 4.90 |
|  | Bahil Adarash | 0.12 | 0.84 | 1.00 | -2.37 | 2.62 |
| EC | Meneharya | Wukro | 0.84 | 1.68 | 1.00 | -4.15 | 5.84 |
| Atote | -0.07 | 1.68 | 1.00 | -5.06 | 4.93 |
| Addis ketema | -1.82 | 1.68 | 0.89 | -6.82 | 3.17 |
| Bahil Adarash | -0.86 | 1.68 | 1.00 | -5.85 | 4.14 |
| HUPF | 2.26 | 1.68 | 0.76 | -2.74 | 7.25 |
| Wukro | Meneharya | -0.84 | 1.68 | 1.00 | -5.84 | 4.15 |
| Atote | -0.91 | 1.68 | 0.99 | -5.90 | 4.08 |
| Addis ketema | -2.67 | 1.68 | 0.61 | -7.66 | 2.33 |
| Bahil Adaras | -1.70 | 1.68 | 0.91 | -6.69 | 3.29 |
| HUPF | 1.41 | 1.68 | 0.96 | -3.58 | 6.40 |
| Atote | Meneharya | 0.07 | 1.68 | 1.00 | -4.93 | 5.06 |
| Wukro | 0.91 | 1.68 | 0.99 | -4.08 | 5.90 |
| Addis ketema | -1.76 | 1.68 | 0.90 | -6.75 | 3.24 |
| BahilAdaras | -0.79 | 1.68 | 1.00 | -5.78 | 4.20 |
| HUPF | 2.32 | 1.68 | 0.74 | -2.67 | 7.32 |
| Addis ketema | Meneharya | 1.82 | 1.68 | 0.89 | -3.17 | 6.82 |
| Wukro | 2.67 | 1.68 | 0.61 | -2.33 | 7.66 |
| Atote | 1.76 | 1.68 | 0.90 | -3.24 | 6.75 |
| BahilAdaras | 0.97 | 1.68 | 0.99 | -4.03 | 5.96 |
| HUPF | 4.08 | 1.68 | 0.17 | -0.92 | 9.07 |
| Bahil Adarash | Meneharya | 0.86 | 1.68 | 1.00 | -4.14 | 5.85 |
| Wukro | 1.70 | 1.68 | 0.91 | -3.29 | 6.69 |
| Atote | 0.79 | 1.68 | 1.00 | -4.20 | 5.78 |
| Addis ketema | -0.97 | 1.68 | 0.99 | -5.96 | 4.03 |
| HUPF | 3.11 | 1.68 | 0.45 | -1.88 | 8.10 |
| HUPF | Meneharya | -2.26 | 1.68 | 0.76 | -7.25 | 2.74 |
| Wukro | -1.41 | 1.68 | 0.96 | -6.40 | 3.58 |
| Atote | -2.32 | 1.68 | 0.74 | -7.32 | 2.67 |
| Addis ketema | -4.08 | 1.68 | 0.17 | -9.07 | 0.92 |
| Bahil Adarash | -3.11 | 1.68 | 0.45 | -8.10 | 1.88 |
| TCC | Meneharya | Wukro | -1.56 | 1.60 | 0.92 | -6.31 | 3.19 |
| Atote | -1.24 | 1.60 | 0.97 | -5.99 | 3.52 |
| Addis ketema | -2.65 | 1.60 | 0.57 | -7.40 | 2.11 |
| Bahil Adarash | 1.11 | 1.60 | 0.98 | -3.64 | 5.86 |
| HUPF | -0.13 | 1.60 | 1.00 | -4.88 | 4.62 |
| Wukro | Meneharya | 1.56 | 1.60 | 0.92 | -3.19 | 6.31 |
| Atote | 0.32 | 1.60 | 1.00 | -4.43 | 5.08 |
| Addis ketema | -1.09 | 1.60 | 0.98 | -5.84 | 3.67 |
| Bahil Adarash | 2.67 | 1.60 | 0.56 | -2.08 | 7.42 |
| HUPF | 1.43 | 1.60 | 0.95 | -3.32 | 6.18 |
| Atote | Meneharya | 1.24 | 1.60 | 0.97 | -3.52 | 5.99 |
| Wukro | -0.32 | 1.60 | 1.00 | -5.08 | 4.43 |
| Addis ketema | -1.41 | 1.60 | 0.95 | -6.16 | 3.34 |
| Bahil Adarash | 2.35 | 1.60 | 0.69 | -2.41 | 7.10 |
| HUPF | 1.10 | 1.60 | 0.98 | -3.65 | 5.86 |
| Addis ketema | Meneharya | 2.65 | 1.60 | 0.57 | -2.11 | 7.40 |
| Wukro | 1.09 | 1.60 | 0.98 | -3.67 | 5.84 |
| Atote | 1.41 | 1.60 | 0.95 | -3.34 | 6.16 |
| Bahil Adarash | 3.76 | 1.60 | 0.20 | -1.00 | 8.51 |
| HUPF | 2.51 | 1.60 | 0.62 | -2.24 | 7.27 |
| BahilAdaras | Meneharya | -1.11 | 1.60 | 0.98 | -5.86 | 3.64 |
| Wukro | -2.67 | 1.60 | 0.56 | -7.42 | 2.08 |
| Atote | -2.35 | 1.60 | 0.69 | -7.10 | 2.41 |
| Addis ketema | -3.76 | 1.60 | 0.20 | -8.51 | 1.00 |
| HUPF | -1.24 | 1.60 | 0.97 | -5.99 | 3.51 |
| HUPF | Meneharya | 0.13 | 1.60 | 1.00 | -4.62 | 4.88 |
| Wukro | -1.43 | 1.60 | 0.95 | -6.18 | 3.32 |
| Atote | -1.10 | 1.60 | 0.98 | -5.86 | 3.65 |
| Addis ketema | -2.51 | 1.60 | 0.62 | -7.27 | 2.24 |
| Bahil Adarash | 1.24 | 1.60 | 0.97 | -3.51 | 5.99 |
| FCC | Meneharya | Wukro | 0.00 | 1.27 | 1.00 | -3.78 | 3.78 |
| Atote | -1.26 | 1.27 | 0.92 | -5.04 | 2.52 |
| Addis ketema | -2.78 | 1.27 | 0.27 | -6.56 | 1.00 |
| BahilAdaras | -4.43* | 1.27 | 0.01 | -8.21 | -0.65 |
| HUPF | -1.23 | 1.27 | 0.93 | -5.01 | 2.55 |
| Wukro | Meneharya | 0.00 | 1.27 | 1.00 | -3.78 | 3.78 |
| Atote | -1.26 | 1.27 | 0.92 | -5.04 | 2.52 |
| Addis ketema | -2.78 | 1.27 | 0.27 | -6.56 | 1.00 |
| Bahil Adarash | -4.43* | 1.27 | 0.01 | -8.21 | -0.65 |
| HUPF | -1.23 | 1.27 | 0.93 | -5.01 | 2.55 |
| Atote | Meneharya | 1.26 | 1.27 | 0.92 | -2.52 | 5.04 |
| Wukro | 1.26 | 1.27 | 0.92 | -2.52 | 5.04 |
| Addis ketema | -1.52 | 1.27 | 0.84 | -5.30 | 2.26 |
| BahilAdarash | -3.18 | 1.27 | 0.15 | -6.96 | 0.60 |
| HUPF | 0.02 | 1.27 | 1.00 | -3.76 | 3.80 |
| Addis ketema | Meneharya | 2.78 | 1.27 | 0.27 | -1.00 | 6.56 |
| Wukro | 2.78 | 1.27 | 0.27 | -1.00 | 6.56 |
| Atote | 1.52 | 1.27 | 0.84 | -2.26 | 5.30 |
| Bahil Adarash | -1.66 | 1.27 | 0.78 | -5.44 | 2.12 |
| HUPF | 1.54 | 1.27 | 0.83 | -2.24 | 5.32 |
| BahilAdaras | Meneharya | 4.43* | 1.27 | 0.01 | 0.65 | 8.21 |
| Wukro | 4.43* | 1.27 | 0.01 | 0.65 | 8.21 |
| Atote | 3.18 | 1.27 | 0.15 | -0.60 | 6.96 |
| Addis ketema | 1.66 | 1.27 | 0.78 | -2.12 | 5.44 |
| HUPF | 3.20 | 1.27 | 0.14 | -0.58 | 6.98 |
| HUPF | Meneharya | 1.23 | 1.27 | 0.93 | -2.55 | 5.01 |
| Wukro | 1.23 | 1.27 | 0.93 | -2.55 | 5.01 |
| Atote | -0.02 | 1.27 | 1.00 | -3.80 | 3.76 |
| Addis ketema | -1.54 | 1.27 | 0.83 | -5.32 | 2.24 |
| Bahil Adarash | -3.20 | 1.27 | 0.14 | -6.98 | 0.58 |
| SC | Meneharya | Wukro | 1.10 | 1.28 | 0.95 | -2.70 | 4.90 |
| Atote | 0.72 | 1.28 | 0.99 | -3.08 | 4.52 |
| Addis ketema | 0.82 | 1.28 | 0.99 | -2.98 | 4.62 |
| Bahil Adarash | 0.67 | 1.28 | 1.00 | -3.13 | 4.47 |
| HUPF | 4.37* | 1.28 | 0.02 | 0.57 | 8.17 |
| Wukro | Meneharya | -1.10 | 1.28 | 0.95 | -4.90 | 2.70 |
| Atote | -0.38 | 1.28 | 1.00 | -4.18 | 3.42 |
| Addis ketema | -0.28 | 1.28 | 1.00 | -4.08 | 3.52 |
| Bahil Adarash | -0.43 | 1.28 | 1.00 | -4.23 | 3.37 |
| HUPF | 3.27 | 1.28 | 0.13 | -0.53 | 7.07 |
| Atote | Meneharya | -0.72 | 1.28 | 0.99 | -4.52 | 3.08 |
| Wukro | 0.38 | 1.28 | 1.00 | -3.42 | 4.18 |
| Addis ketema | 0.10 | 1.28 | 1.00 | -3.70 | 3.90 |
| BahilAdaras | -0.06 | 1.28 | 1.00 | -3.86 | 3.74 |
| HUPF | 3.64 | 1.28 | 0.07 | -0.16 | 7.44 |
| Addis ketema | Meneharya | -0.82 | 1.28 | 0.99 | -4.62 | 2.98 |
| Wukro | 0.28 | 1.28 | 1.00 | -3.52 | 4.08 |
| Atote | -0.10 | 1.28 | 1.00 | -3.90 | 3.70 |
| Bahil Adarash | -0.16 | 1.28 | 1.00 | -3.96 | 3.64 |
| HUPF | 3.54 | 1.28 | 0.08 | -0.26 | 7.34 |
| Bahil Adarash | Meneharya | -0.67 | 1.28 | 1.00 | -4.47 | 3.13 |
| Wukro | 0.43 | 1.28 | 1.00 | -3.37 | 4.23 |
| Atote | 0.06 | 1.28 | 1.00 | -3.74 | 3.86 |
| Addis ketema | 0.16 | 1.28 | 1.00 | -3.64 | 3.96 |
| HUPF | 3.70 | 1.28 | 0.06 | -0.10 | 7.50 |
| HUPF | Meneharya | -4.37* | 1.28 | 0.02 | -8.17 | -0.57 |
| Wukro | -3.27 | 1.28 | 0.13 | -7.07 | 0.53 |
| Atote | -3.64 | 1.28 | 0.07 | -7.44 | 0.16 |
| Addis ketema | -3.54 | 1.28 | 0.08 | -7.34 | 0.26 |
| BahilAdaras | -3.70 | 1.28 | 0.06 | -7.50 | 0.10 |
| YMC | Meneharya | Wukro | 0.24 | 1.13 | 1.00 | -3.10 | 3.59 |
| Atote | 6.44* | 1.13 | 0.00 | 3.10 | 9.79 |
| Addis ketema | 1.87 | 1.13 | 0.57 | -1.48 | 5.21 |
| Bahil Adarash | 5.22* | 1.13 | 0.00 | 1.88 | 8.57 |
| HUPF | 9.34* | 1.13 | 0.00 | 6.00 | 12.69 |
| Wukro | Meneharya | -0.24 | 1.13 | 1.00 | -3.59 | 3.10 |
| Atote | 6.20* | 1.13 | 0.00 | 2.85 | 9.55 |
| Addis ketema | 1.62 | 1.13 | 0.70 | -1.72 | 4.97 |
| BahilAdaras | 4.98* | 1.13 | 0.00 | 1.63 | 8.32 |
| HUPF | 9.10* | 1.13 | 0.00 | 5.75 | 12.45 |
| Atote | Meneharya | -6.44* | 1.13 | 0.00 | -9.79 | -3.10 |
| Wukro | -6.20* | 1.13 | 0.00 | -9.55 | -2.85 |
| Addis ketema | -4.58* | 1.13 | 0.00 | -7.92 | -1.23 |
| Bahil Adarash | -1.22 | 1.13 | 0.89 | -4.57 | 2.12 |
| HUPF | 2.90 | 1.13 | 0.12 | -0.45 | 6.25 |
| Addis ketema | Meneharya | -1.87 | 1.13 | 0.57 | -5.21 | 1.48 |
| Wukro | -1.62 | 1.13 | 0.70 | -4.97 | 1.72 |
| Atote | 4.58* | 1.13 | 0.00 | 1.23 | 7.92 |
| BahilAdaras | 3.36* | 1.13 | 0.05 | 0.01 | 6.70 |
| HUPF | 7.48* | 1.13 | 0.00 | 4.13 | 10.82 |
| BahilAdaras | Meneharya | -5.22222* | 1.13 | 0.00 | -8.57 | -1.88 |
| Wukro | -4.98* | 1.13 | 0.00 | -8.32 | -1.63 |
| Atote | 1.22 | 1.13 | 0.89 | -2.12 | 4.57 |
| Addis ketema | -3.36* | 1.13 | 0.05 | -6.70 | -0.01 |
| HUPF | 4.12* | 1.13 | 0.01 | 0.78 | 7.47 |
| HUPF | Meneharya | -9.34* | 1.13 | 0.00 | -12.69 | -6.00 |
| Wukro | -9.10* | 1.13 | 0.00 | -12.45 | -5.75 |
| Atote | -2.90 | 1.13 | 0.12 | -6.25 | 0.45 |
| Addis ketema | -7.48* | 1.13 | 0.00 | -10.82 | -4.13 |
| Bahil Adarash | -4.12* | 1.13 | 0.01 | -7.47 | -0.78 |
